# Supplementary material
Source: publisher figshare collection journal article supplement (https://frontiersin.figshare.com/ndownloader/files/31025947)
Supplement: Supplementary file [file 31025947]

## *Supplementary Materials*

### Supplementary file 2

Supplementary Table 1. Pearson's correlations among domains for the whole sample of responders (N=386)

|                                   | Communication | Care and Treatment | Parental Participation | Organization/Hospital environment | Professional Attitude |
|-----------------------------------|---------------|--------------------|------------------------|-----------------------------------|-----------------------|
| Communication                     | 1             |                    |                        |                                   |                       |
| Care and Treatment                | 0.82          | 1                  |                        |                                   |                       |
| Parental Participation            | 0.87          | 0.91               | 1                      |                                   |                       |
| Organization/Hospital environment | 0.71          | 0.88               | 0.85                   | 1                                 |                       |
| Professional Attitude             | 0.81          | 0.91               | 0.89                   | 0.84                              | 1                     |

\*all correlations were statistically significant;  $p < 0.001$

Supplementary Table 2 CFA factor loadings

|     | Whole Sample  |                    |                        |                                   |                       | Amharic       |                    |                        |                                   |                       | Afar Oromo    |                    |                        |                                   |                       |
|-----|---------------|--------------------|------------------------|-----------------------------------|-----------------------|---------------|--------------------|------------------------|-----------------------------------|-----------------------|---------------|--------------------|------------------------|-----------------------------------|-----------------------|
|     | Communication | Care and Treatment | Parental Participation | Organization/Hospital environment | Professional Attitude | Communication | Care and Treatment | Parental Participation | Organization/Hospital environment | Professional Attitude | Communication | Care and Treatment | Parental Participation | Organization/Hospital environment | Professional Attitude |
| Q1  | 0.50          | 0                  | 0                      | 0                                 | 0                     | 0.45          | 0                  | 0                      | 0                                 | 0                     | 0.60          | 0                  | 0                      | 0                                 | 0                     |
| Q2  | 0.80          | 0                  | 0                      | 0                                 | 0                     | 0.81          | 0                  | 0                      | 0                                 | 0                     | 0.79          | 0                  | 0                      | 0                                 | 0                     |
| Q3  | 0.64          | 0                  | 0                      | 0                                 | 0                     | 0.55          | 0                  | 0                      | 0                                 | 0                     | 0.86          | 0                  | 0                      | 0                                 | 0                     |
| Q4  | 0.65          | 0                  | 0                      | 0                                 | 0                     | 0.54          | 0                  | 0                      | 0                                 | 0                     | 0.88          | 0                  | 0                      | 0                                 | 0                     |
| Q5  | 0.66          | 0                  | 0                      | 0                                 | 0                     | 0.62          | 0                  | 0                      | 0                                 | 0                     | 0.69          | 0                  | 0                      | 0                                 | 0                     |
| Q6  | 0.63          | 0                  | 0                      | 0                                 | 0                     | 0.64          | 0                  | 0                      | 0                                 | 0                     | 0.63          | 0                  | 0                      | 0                                 | 0                     |
| Q7  | 0.79          | 0                  | 0                      | 0                                 | 0                     | 0.82          | 0                  | 0                      | 0                                 | 0                     | 0.70          | 0                  | 0                      | 0                                 | 0                     |
| Q8  | 0             | 0.76               | 0                      | 0                                 | 0                     | 0             | 0.71               | 0                      | 0                                 | 0                     | 0             | 0.76               | 0                      | 0                                 | 0                     |
| Q9  | 0             | 0.67               | 0                      | 0                                 | 0                     | 0             | 0.64               | 0                      | 0                                 | 0                     | 0             | 0.59               | 0                      | 0                                 | 0                     |
| Q10 | 0             | 0.75               | 0                      | 0                                 | 0                     | 0             | 0.69               | 0                      | 0                                 | 0                     | 0             | 0.79               | 0                      | 0                                 | 0                     |
| Q11 | 0             | 0.79               | 0                      | 0                                 | 0                     | 0             | 0.81               | 0                      | 0                                 | 0                     | 0             | 0.63               | 0                      | 0                                 | 0                     |

|             |   |          |      |      |      |   |          |      |      |      |   |          |      |      |      |
|-------------|---|----------|------|------|------|---|----------|------|------|------|---|----------|------|------|------|
| Q<br>1<br>3 | 0 | 0.7<br>9 | 0    | 0    | 0    | 0 | 0.8<br>1 | 0    | 0    | 0    | 0 | 0.6<br>3 | 0    | 0    | 0    |
| Q<br>1<br>4 | 0 | 0.8<br>4 | 0    | 0    | 0    | 0 | 0.8<br>6 | 0    | 0    | 0    | 0 | 0.6<br>6 | 0    | 0    | 0    |
| Q<br>1<br>5 | 0 | 0.7<br>7 | 0    | 0    | 0    | 0 | 0.7<br>5 | 0    | 0    | 0    | 0 | 0.7<br>2 | 0    | 0    | 0    |
| Q<br>1<br>6 | 0 | 0.6<br>5 | 0    | 0    | 0    | 0 | 0.6<br>6 | 0    | 0    | 0    | 0 | 0.6<br>6 | 0    | 0    | 0    |
| Q<br>1<br>7 | 0 | 0        | 0.53 | 0    | 0    | 0 | 0        | 0.48 | 0    | 0    | 0 | 0        | 0.84 | 0    | 0    |
| Q<br>1<br>8 | 0 | 0        | 0.21 | 0    | 0    | 0 | 0        | 0.24 | 0    | 0    | 0 | 0        | 0.79 | 0    | 0    |
| Q<br>1<br>9 | 0 | 0        | 0.40 | 0    | 0    | 0 | 0        | 0.37 | 0    | 0    | 0 | 0        | 0.86 | 0    | 0    |
| Q<br>2<br>0 | 0 | 0        | 0.81 | 0    | 0    | 0 | 0        | 0.83 | 0    | 0    | 0 | 0        | 0.46 | 0    | 0    |
| Q<br>2<br>1 | 0 | 0        | 0.55 | 0    | 0    | 0 | 0        | 0.66 | 0    | 0    | 0 | 0        | 0.51 | 0    | 0    |
| Q<br>2<br>2 | 0 | 0        | 0.32 | 0    | 0    | 0 | 0        | 0.51 | 0    | 0    | 0 | 0        | 0.52 | 0    | 0    |
| Q<br>2<br>3 | 0 | 0        | 0    | 0.77 | 0    | 0 | 0        | 0    | 0.80 | 0    | 0 | 0        | 0    | 0.72 | 0    |
| Q<br>2<br>4 | 0 | 0        | 0    | 0.74 | 0    | 0 | 0        | 0    | 0.72 | 0    | 0 | 0        | 0    | 0.91 | 0    |
| Q<br>2<br>5 | 0 | 0        | 0    | 0.78 | 0    | 0 | 0        | 0    | 0.80 | 0    | 0 | 0        | 0    | 0.67 | 0    |
| Q<br>2<br>6 | 0 | 0        | 0    | 0.57 | 0    | 0 | 0        | 0    | 0.49 | 0    | 0 | 0        | 0    | 0.86 | 0    |
| Q<br>2<br>7 | 0 | 0        | 0    | 0.54 | 0    | 0 | 0        | 0    | 0.42 | 0    | 0 | 0        | 0    | 0.89 | 0    |
| Q<br>2<br>8 | 0 | 0        | 0    | 0.77 | 0    | 0 | 0        | 0    | 0.73 | 0    | 0 | 0        | 0    | 0.83 | 0    |
| Q<br>3<br>0 | 0 | 0        | 0    | 0    | 0.64 | 0 | 0        | 0    | 0    | 0.56 | 0 | 0        | 0    | 0    | 0.84 |
| Q<br>3<br>1 | 0 | 0        | 0    | 0    | 0.61 | 0 | 0        | 0    | 0    | 0.49 | 0 | 0        | 0    | 0    | 0.86 |
| Q<br>3<br>2 | 0 | 0        | 0    | 0    | 0.37 | 0 | 0        | 0    | 0    | 0.31 | 0 | 0        | 0    | 0    | 0.81 |
| Q<br>3<br>3 | 0 | 0        | 0    | 0    | 0.87 | 0 | 0        | 0    | 0    | 0.86 | 0 | 0        | 0    | 0    | 0.87 |
| Q<br>3<br>4 | 0 | 0        | 0    | 0    | 0.68 | 0 | 0        | 0    | 0    | 0.63 | 0 | 0        | 0    | 0    | 0.80 |
| Q<br>3<br>5 | 0 | 0        | 0    | 0    | 0.76 | 0 | 0        | 0    | 0    | 0.77 | 0 | 0        | 0    | 0    | 0.62 |

|                      |   |   |   |   |      |   |   |   |   |      |   |   |   |   |      |
|----------------------|---|---|---|---|------|---|---|---|---|------|---|---|---|---|------|
| <b>Q<br/>3<br/>6</b> | 0 | 0 | 0 | 0 | 0.88 | 0 | 0 | 0 | 0 | 0.89 | 0 | 0 | 0 | 0 | 0.79 |
| <b>Q<br/>3<br/>7</b> | 0 | 0 | 0 | 0 | 0.46 | 0 | 0 | 0 | 0 | 0.45 | 0 | 0 | 0 | 0 | 0.70 |
| <b>Q<br/>3<br/>8</b> | 0 | 0 | 0 | 0 | 0.85 | 0 | 0 | 0 | 0 | 0.83 | 0 | 0 | 0 | 0 | 0.85 |

Supplementary Table 3. Mean score of the 38 EMPATHIC-N questions (N=38).

| Variable, mean (sd)                                                                                            | N   | Level I<br>(n=32) | Level II<br>(n=117) | Level III<br>(n=237) | Total<br>sample<br>(n=386) |
|----------------------------------------------------------------------------------------------------------------|-----|-------------------|---------------------|----------------------|----------------------------|
| <b>Communication (Information and Education)</b>                                                               |     |                   |                     |                      |                            |
| 1. We had a daily meeting with the health workers about the medication and the care of our child               | 386 | 3.31 (2.04)       | 5.30 (1.10)         | 3.52 (1.40)          | 4.04 (1.61)                |
| 2. Health workers answered our questions clearly                                                               | 386 | 4.22 (1.43)       | 5.31 (0.92)         | 4.35 (1.20)          | 4.63 (1.23)                |
| 3. We were immediately informed in case of worsening of our child's health condition                           | 386 | 3.75 (1.81)       | 5.13 (1.00)         | 4.45 (1.33)          | 4.60 (1.35)                |
| 4. Health workers provided us clear information about our child illness                                        | 386 | 3.31 (1.84)       | 5.15 (1.07)         | 4.28 (1.41)          | 4.46 (1.45)                |
| 5. Health workers clearly informed us about the consequences of the treatment administered to our child        | 386 | 3.91 (1.57)       | 4.99 (1.21)         | 4.26 (1.39)          | 4.45 (1.40)                |
| 6. Health workers informed us about the prospects for our child's future health                                | 386 | 3.19 (1.97)       | 4.96 (1.40)         | 4.55 (1.25)          | 4.56 (1.44)                |
| 7. The information health workers gave us was very clear                                                       | 386 | 3.97 (1.47)       | 5.41 (0.91)         | 4.61 (1.10)          | 4.80 (1.17)                |
| <b>Care and Treatment</b>                                                                                      |     |                   |                     |                      |                            |
| 8. Physician-nurse collaboration was good                                                                      | 386 | 4.97 (0.74)       | 5.65 (0.58)         | 5.11 (0.75)          | 5.26 (0.75)                |
| 9. Health workers took prompt actions in case of worsening of our child's clinical condition                   | 386 | 4.53 (1.19)       | 5.59 (0.57)         | 4.84 (0.92)          | 5.04 (0.93)                |
| 10. Our child's needs were efficiently met                                                                     | 386 | 4.31 (1.03)       | 5.51 (0.74)         | 4.27 (1.11)          | 4.65 (1.15)                |
| 11. Health workers cared about our child's well-being                                                          | 386 | 4.56 (1.16)       | 5.46 (0.65)         | 4.61 (1.06)          | 4.87 (1.04)                |
| 12. We were informed on a day-to-day basis about the physicians and the nurses who were in charge of our child | 386 | 1.00 (0.00)       | 1.12 (0.59)         | 1.64 (1.08)          | 1.43 (0.94)                |
| 13. Health workers emotionally supported us in an appropriate manner                                           | 386 | 4.88 (0.98)       | 5.57 (0.65)         | 4.23 (1.35)          | 4.69 (1.30)                |
| 14. Health workers met well our needs                                                                          | 386 | 4.84 (1.14)       | 5.62 (0.70)         | 4.45 (1.16)          | 4.84 (1.16)                |
| 15. A nurse always supported us in case of emergency                                                           | 386 | 4.66 (1.26)       | 5.64 (0.62)         | 4.81 (0.98)          | 5.05 (1.00)                |

|                                                                                                            |     |             |             |             |             |
|------------------------------------------------------------------------------------------------------------|-----|-------------|-------------|-------------|-------------|
| 16. Nurses always cared about our child cleanness/hygiene and that he/she was comfortable in the incubator | 386 | 4.75 (0.95) | 5.50 (0.82) | 5.11 (0.84) | 5.20 (0.87) |
| <b>Parental Participation</b>                                                                              |     |             |             |             |             |
| 17. We were actively involved in the decision about our child's care and treatment                         | 386 | 4.78 (1.34) | 5.18 (1.10) | 4.16 (1.25) | 4.52 (1.30) |
| 18. We were encouraged to stay next to our child                                                           | 386 | 4.69 (1.06) | 5.32 (1.05) | 5.83 (0.53) | 5.58 (0.85) |
| 19. Nurses encouraged us to help them while caring for our child.                                          | 384 | 4.58 (0.99) | 5.25 (1.05) | 5.19 (0.84) | 5.16 (0.93) |
| 20. We have confidence in the health staff                                                                 | 386 | 4.41 (1.34) | 5.64 (0.58) | 4.49 (1.09) | 4.83 (1.12) |
| 21. Nurses taught us how to take care of our newborn child                                                 | 386 | 4.31 (1.42) | 5.26 (1.15) | 5.35 (1.07) | 5.23 (1.16) |
| 22. We received information about our child's care before his/her transfer or discharge                    | 386 | 3.38 (1.66) | 4.56 (1.87) | 5.40 (1.04) | 4.97 (1.52) |
| <b>Organization/Hospital environment</b>                                                                   |     |             |             |             |             |
| 23. Ward/section of NICU stay gave us a safety sensation                                                   | 386 | 4.28 (1.20) | 5.56 (0.85) | 4.95 (0.66) | 5.08 (0.85) |
| 24. Our child incubator or the crib was clean                                                              | 386 | 4.66 (0.75) | 5.62 (0.55) | 5.17 (0.75) | 5.26 (0.75) |
| 25. The healthcare staff worked efficiently                                                                | 386 | 5.19 (0.74) | 5.59 (0.60) | 4.79 (0.97) | 5.06 (0.93) |
| 26. The space around the incubator/crib was enough                                                         | 385 | 4.34 (1.00) | 5.51 (0.77) | 1.97 (1.07) | 3.24 (1.90) |
| 27. The ward/NICU section was clean                                                                        | 386 | 4.50 (0.88) | 5.58 (0.63) | 4.94 (1.04) | 5.10 (0.98) |
| 28. The atmosphere in the ward/NICU was cordial and without hostilities                                    | 386 | 4.19 (1.09) | 5.58 (0.67) | 4.73 (0.89) | 4.94 (0.96) |
| <b>Professional Attitude</b>                                                                               |     |             |             |             |             |
| 29. Nurses and physician always introduced themselves by saying their name and their role                  | 386 | 1.00 (0.00) | 1.02 (0.13) | 1.14 (0.66) | 1.09 (0.53) |
| 30. We received sympathy from health workers                                                               | 386 | 3.97 (1.15) | 5.64 (0.75) | 4.54 (1.11) | 4.83 (1.16) |
| 31. The healthcare staff following the hygiene rules                                                       | 386 | 4.38 (1.04) | 5.62 (0.67) | 4.97 (0.79) | 5.12 (0.86) |
| 32. The healthcare staff cared about our child and our privacy                                             | 386 | 4.22 (1.26) | 5.63 (0.62) | 5.77 (0.43) | 5.60 (0.73) |
| 33. The healthcare staff showed respect towards our child and us                                           | 386 | 4.28 (1.20) | 5.67 (0.59) | 4.38 (1.26) | 4.76 (1.24) |
| 34. The atmosphere among staff was pleasant                                                                | 386 | 4.44 (0.84) | 5.72 (0.65) | 5.08 (0.63) | 5.22 (0.75) |
| 35. We were warmly welcomed by the staff                                                                   | 386 | 4.56 (0.62) | 5.59 (0.74) | 4.72 (0.97) | 4.97 (0.97) |
| 36. The healthcare staff gave the proper attention to our child and us despite their workload              | 386 | 4.44 (0.80) | 5.61 (0.64) | 4.70 (1.17) | 4.96 (1.10) |
| 37. Our culture of origin was taken into account.                                                          | 386 | 1.12 (0.55) | 5.68 (0.54) | 5.02 (0.56) | 4.90 (1.30) |
| 38. Health workers were always willing to listen to us                                                     | 386 | 3.84 (1.19) | 5.61 (0.73) | 4.41 (1.31) | 4.73 (1.30) |

Supplementary Table 4. Overall experience and impression items mean scores.

| Variable, mean (sd)                                                                                     | N   | Level I     | Level II    | Level III   | Overall sample |
|---------------------------------------------------------------------------------------------------------|-----|-------------|-------------|-------------|----------------|
|                                                                                                         |     | (n=32)      | (n=117)     | (n=237)     | (n=386)        |
| Overall experience <sup>a</sup> (6-points scale)                                                        |     |             |             |             |                |
| 39. We would recommend this NICU to anyone facing a similar situation                                   | 386 | 4.66 (0.94) | 5.21 (0.45) | 5.08 (1.31) | 5.08 (1.10)    |
| 40.If ever we would get in the same situation again, we would like to come back to this NICU            | 386 | 4.88 (0.61) | 5.25 (0.47) | 5.08 (1.33) | 5.12 (1.09)    |
| Overall impression <sup>b</sup> (5-points scale)                                                        |     |             |             |             |                |
| 41.All in all, how satisfied or dissatisfied are you with the treatment the child received at the NICU? | 386 | 3.88 (0.91) | 4.66 (0.60) | 4.46 (1.01) | 4.47 (0.91)    |
| 42. All in all, how satisfied or dissatisfied are you with how you weretreated as a parent?             | 386 | 3.59 (0.98) | 4.60 (0.68) | 4.45 (1.01) | 4.42 (0.95)    |

Supplementary Table 5. Pearson's correlations between construct questionnaire domains and overall questions.

|                            | Communication | Care and Treatment | Parental Participation | Organization/ Hospital environment | Professional Attitude |
|----------------------------|---------------|--------------------|------------------------|------------------------------------|-----------------------|
| <b>Overall experience</b>  |               |                    |                        |                                    |                       |
| <b>Q39</b>                 | 0.44          | 0.61               | 0.52                   | 0.37                               | 0.59                  |
| <b>Q40</b>                 | 0.43          | 0.64               | 0.52                   | 0.4                                | 0.59                  |
| <b>Overall impressionn</b> |               |                    |                        |                                    |                       |
| <b>Q41</b>                 | 0.49          | 0.6                | 0.46                   | 0.41                               | 0.62                  |
| <b>Q42</b>                 | 0.47          | 0.57               | 0.46                   | 0.39                               | 0.63                  |

\*all correlations were statistically significant;  $p < 0.001$

<sup>a</sup> answers options were the same as Q1-Q38 items.

<sup>b</sup> answers options were 'very dissatisfied/quite dissatisfied/neither satisfied nor dissatisfied/quite satisfied/very satisfied'.

Supplementary Table 6. Multiple regression results for associations between domain scores and NICU levels, models were adjusted age, level of education, residence, occupation, length of stay. Missing observations were deleted listwise.

| Outcome                |       | (Intercept) | Level I NICU <sup>a</sup> | Level III NICU <sup>a</sup> |
|------------------------|-------|-------------|---------------------------|-----------------------------|
| Communication          | Coeff | 5.10        | -1.55                     | -0.88                       |
|                        | SE    | 0.15        | 0.12                      | 0.08                        |
|                        | P     | < 0.0001    | < 0.0001                  | < 0.0001                    |
| Care and Treatment     | Coeff | 5.29        | -0.86                     | -0.88                       |
|                        | SE    | 0.15        | 0.12                      | 0.08                        |
|                        | P     | < 0.0001    | < 0.0001                  | < 0.0001                    |
| Parental Participation | Coeff | 5.22        | -0.89                     | -0.15                       |
|                        | SE    | 0.15        | 0.12                      | 0.08                        |
|                        | P     | < 0.0001    | < 0.0001                  | 0.072                       |

|                                    |       |          |          |          |
|------------------------------------|-------|----------|----------|----------|
| Organization/ Hospital environment | Coeff | 5.40     | -1.05    | -1.17    |
|                                    | SE    | 0.15     | 0.12     | 0.08     |
|                                    | P     | < 0.0001 | < 0.0001 | < 0.0001 |
| Professional Attitude              | Coeff | 5.39     | -1.73    | -0.77    |
|                                    | SE    | 0.15     | 0.12     | 0.08     |
|                                    | P     | < 0.0001 | < 0.0001 | < 0.0001 |
| Total satisfaction score           | Coeff | 5.28     | -1.25    | -0.78    |
|                                    | SE    | 0.15     | 0.12     | 0.08     |
|                                    | P     | < 0.0001 | < 0.0001 | < 0.0001 |

<sup>a</sup> Level II NICU is taken as reference level.

Supplementary Table 7. Univariate associations (Fisher exact tests) between participants sociodemographic characteristics and general questions on overall experience and impression.

|                                                | EXPERIENCE                              |                                         |                                         |                                         | IMPRESSION                                       |                                                  |                                                  |                                                  |
|------------------------------------------------|-----------------------------------------|-----------------------------------------|-----------------------------------------|-----------------------------------------|--------------------------------------------------|--------------------------------------------------|--------------------------------------------------|--------------------------------------------------|
|                                                | Q39, n (%)                              |                                         | Q40, n (%)                              |                                         | Q41, n (%)                                       |                                                  | Q42, n (%)                                       |                                                  |
|                                                | Not at all/small/in some extent/largely | Not at all/small/in some extent/largely | Not at all/small/in some extent/largely | Not at all/small/in some extent/largely | Not satisfied/ Neither satisfied nor unsatisfied | Not satisfied/ Neither satisfied nor unsatisfied | Not satisfied/ Neither satisfied nor unsatisfied | Not satisfied/ Neither satisfied nor unsatisfied |
| <b>Language</b>                                |                                         |                                         |                                         |                                         |                                                  |                                                  |                                                  |                                                  |
| Amharic                                        | 49 (17.7)                               | 228 (82.3)                              | 48 (17.3)                               | 229 (82.7)                              | 45 (16.2)                                        | 232 (83.8)                                       | 48 (17.3)                                        | 229 (82.7)                                       |
| Afan Oromo                                     | 12 (11.0)                               | 97 (89.0)                               | 8 (7.3)                                 | 101 (92.7)                              | 11 (10.1)                                        | 98 (89.9)                                        | 21 (19.3)                                        | 88 (80.7)                                        |
| <i>P<sup>a</sup></i>                           | 0.12                                    |                                         | 0.01                                    |                                         | 0.15                                             |                                                  | 0.66                                             |                                                  |
| <b>Age (26 years is the sample median age)</b> |                                         |                                         |                                         |                                         |                                                  |                                                  |                                                  |                                                  |
| ≤26 years                                      | 34 (17.1)                               | 165 (82.9)                              | 31 (15.6)                               | 168 (84.4)                              | 27 (13.6)                                        | 172 (86.4)                                       | 33 (16.6)                                        | 166 (83.4)                                       |
| >26 years                                      | 27 (14.4)                               | 160 (85.6)                              | 25 (13.4)                               | 162 (86.6)                              | 29 (15.5)                                        | 158 (84.5)                                       | 36 (19.3)                                        | 151 (80.7)                                       |
| <i>P<sup>a</sup></i>                           | 0.49                                    |                                         | 0.57                                    |                                         | 0.66                                             |                                                  | 0.51                                             |                                                  |
| <b>Education's level</b>                       |                                         |                                         |                                         |                                         |                                                  |                                                  |                                                  |                                                  |
| No education                                   | 7 (9.2)                                 | 69 (90.8)                               | 5 (6.6)                                 | 71 (93.4)                               | 4 (5.3)                                          | 72 (94.7)                                        | 6 (7.9)                                          | 70 (92.1)                                        |
| Low education                                  | 12 (9.0)                                | 122 (91.0)                              | 10 (7.5)                                | 124 (92.5)                              | 11 (8.2)                                         | 123 (91.8)                                       | 15 (11.2)                                        | 119 (88.8)                                       |
| High education                                 | 42 (23.9)                               | 134 (76.1)                              | 41 (23.3)                               | 135 (76.7)                              | 41 (23.3)                                        | 135 (76.7)                                       | 48 (27.3)                                        | 128 (72.7)                                       |
| <i>P<sup>a</sup></i>                           | <0.001                                  |                                         | <0.001                                  |                                         | <0.001                                           |                                                  | <0.001                                           |                                                  |
| <b>Occupation</b>                              |                                         |                                         |                                         |                                         |                                                  |                                                  |                                                  |                                                  |

|                       |           |            |           |            |           |            |           |            |
|-----------------------|-----------|------------|-----------|------------|-----------|------------|-----------|------------|
| Homeworking           | 31 (12.5) | 217 (87.5) | 27 (10.9) | 221 (89.1) | 24 (9.7)  | 224 (90.3) | 30 (12.1) | 218 (87.9) |
| Others                | 30 (21.7) | 108 (78.3) | 29 (21.0) | 109 (79.0) | 32 (23.2) | 106 (76.8) | 39 (28.3) | 99 (71.7)  |
| <i>P<sup>a</sup></i>  | 0.02      |            | 0.01      |            | <0.001    |            | <0.001    |            |
| <b>Length of stay</b> |           |            |           |            |           |            |           |            |
| <1 week               | 30 (13.0) | 201 (87.0) | 29 (12.6) | 202 (87.4) | 32 (13.9) | 199 (86.1) | 38 (16.5) | 193 (83.5) |
| 1-2 weeks             | 20 (17.1) | 97 (82.9)  | 18 (15.4) | 99 (84.6)  | 17 (14.5) | 100 (85.5) | 23 (19.7) | 94 (80.3)  |
| >2 weeks              | 11 (28.9) | 27 (71.1)  | 9 (23.7)  | 29 (76.3)  | 7 (18.4)  | 31 (81.6)  | 8 (21.1)  | 30 (78.9)  |
| <i>P<sup>a</sup></i>  | 0.05      |            | 0.18      |            | 0.69      |            | 0.62      |            |
| <b>Residence</b>      |           |            |           |            |           |            |           |            |
| Rural                 | 16 (12.5) | 112 (87.5) | 11 (8.6)  | 117 (91.4) | 13 (10.2) | 115 (89.8) | 20 (15.6) | 108 (84.4) |
| Urban                 | 44 (17.5) | 208 (82.5) | 44 (17.5) | 208 (82.5) | 43 (17.1) | 209 (82.9) | 49 (19.4) | 203 (80.6) |
| <i>P<sup>a</sup></i>  | 0.24      |            | 0.02      |            | 0.09      |            | 0.4       |            |

<sup>a</sup> Fisher's exact tests and Wilcoxon rank-sum test.

Supplementary Table 8. Logistic Regression odds ratios <sup>a</sup> (OR) and 95% confidence intervals results estimating difference for general experience and impression in satisfaction agreement between participants sociodemographic characteristics.

|                       | EXPERIENCE      |              |        |                 |              |        | IMPRESSION      |              |       |                 |              |        |
|-----------------------|-----------------|--------------|--------|-----------------|--------------|--------|-----------------|--------------|-------|-----------------|--------------|--------|
|                       | Q39             |              |        | Q40             |              |        | Q41             |              |       | Q42             |              |        |
|                       | OR <sup>a</sup> | 95 %CI       | P      | OR <sup>a</sup> | 95 %CI       | P      | OR <sup>a</sup> | 95 %CI       | P     | OR <sup>a</sup> | 95 %CI       | P      |
| <b>Level I NICU</b>   | 0.03            | [0.00, 0.11] | <0.001 | 0.05            | [0.01, 0.22] | <0.001 | 0.26            | [0.07, 1.00] | 0.044 | 0.14            | [0.05, 0.37] | <0.001 |
| <b>Level III NICU</b> | 0.07            | [0.01, 0.25] | <0.001 | 0.09            | [0.01, 0.30] | 0.001  | 0.27            | [0.09, 0.67] | 0.008 | 0.55            | [0.24, 1.17] | 0.13   |

<sup>a</sup> Models were adjusted for age, education's level, occupation, child's length of stay and residence area.
